# Supplementary material for: Modeling as a Tool for Transboundary Aquifer Assessment Prioritization
Source: MDPI journal article supplement (doi:10.3390/w13192685), 2021-09-28
Supplement: s1 [file s1]

# Supplementary Materials

## 1. Model Access

The model can be accessed online at the following address:

<https://exchange.iiseesystems.com/models/player/ashleyatkins/delays>

## 2. Map of Study Site

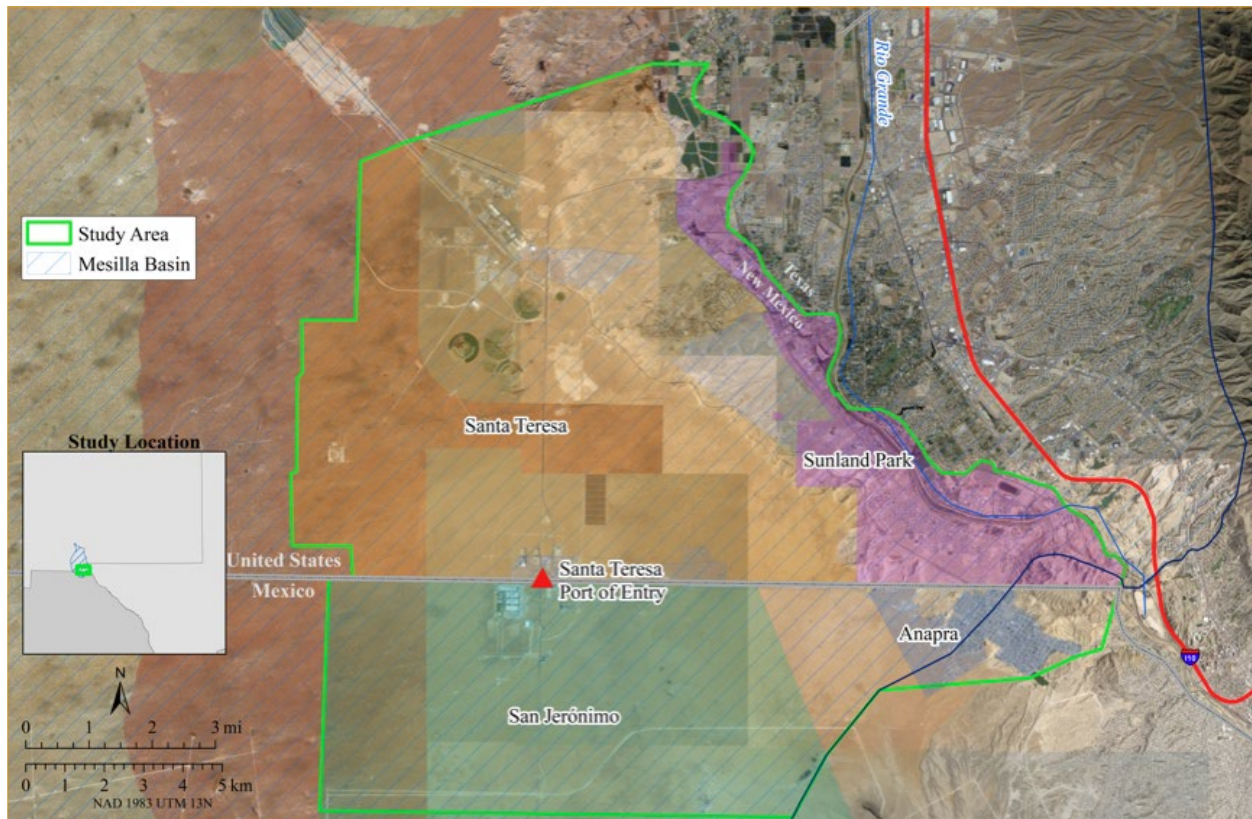

A map of the study site, as it appeared in Page et al., “A Dynamic Hydro-Socio-Technical Policy Analysis of Transboundary Desalination Development,” *Journal of Environmental Accounting and Management* 7, no. 1 (2019).

### 3. Model Documentation

|                                      | Equation                                                                                                                                                                        | Properties                        | Units            |
|--------------------------------------|---------------------------------------------------------------------------------------------------------------------------------------------------------------------------------|-----------------------------------|------------------|
| Top-Level Model:                     |                                                                                                                                                                                 |                                   |                  |
| □ Demand:                            |                                                                                                                                                                                 |                                   |                  |
| ○ consumption_demand                 | $A.\text{smooth\_conservation\_effect\_on\_use} + B.\text{consumption\_demand}$                                                                                                 |                                   | acre*ft/yr       |
| ○ withdrawal_demand                  | $A.\text{water\_demand} + B.\text{withdrawal\_demand}$                                                                                                                          |                                   | acre*ft/yr       |
| □ Desalination_Capacity:             |                                                                                                                                                                                 |                                   |                  |
| ▢ Desalination_Capacity(t)           | $\text{Desalination\_Capacity}(t - dt) + (\text{desalination\_capacity\_development} - \text{desalination\_plant\_decay}) * dt$                                                 | INIT<br>Desalination_Capacity = 0 | acre*ft/yr       |
| ⚙ desalination_capacity_development  | $\text{DELAY3}(\text{indicated\_desalination\_development}, \text{desalination\_development\_delay})$                                                                           |                                   | acre*ft/yr/Years |
| ⚙ desalination_plant_decay           | $\text{Desalination\_Capacity} / \text{desalination\_plant\_life}$                                                                                                              |                                   | acre*ft/yr/Years |
| ○ cap_utilization_p                  | 1                                                                                                                                                                               |                                   | 1                |
| ○ demand_gap                         | $A.\text{reported\_demand\_gap} + B.\text{reported\_demand\_gap}$                                                                                                               |                                   | acre*ft/yr       |
| ○ desalination_capacity_utilization  | $\text{MIN}(1, 2 - 2 / ((\text{MAX}(0, \text{demand\_gap}) / \text{MAX}(1, \text{Desalination\_Capacity}))^{\text{cap\_utilization\_p}} + 1))$                                  |                                   | 1                |
| ○ desalination_development_delay     | 15                                                                                                                                                                              |                                   | yr               |
| ○ desalination_plant_life            | 10                                                                                                                                                                              |                                   | yr               |
| ○ desired_addition_to_desal_capacity | $(1 - \text{strategic\_thinking\_weight}) * \text{demand\_gap} + \text{strategic\_thinking\_weight} * \text{predicted\_demand\_gap}$                                            |                                   | acre*ft/yr       |
| ○ gap_closure_time                   | 1                                                                                                                                                                               |                                   | yr               |
| ○ indicated_desalination_development | $\text{perceived\_desalination\_gap} / \text{gap\_closure\_time}$                                                                                                               |                                   | acre*ft/yr/Years |
| ⊙ perceived_desalination_gap         | $\text{SMTH1}(\text{desired\_addition\_to\_desal\_capacity}, \text{policy\_perception\_delay})$                                                                                 |                                   | acre*ft/yr       |
| ○ policy_perception_delay            | 2                                                                                                                                                                               |                                   | yr               |
| ○ predicted_demand_gap               | $\text{FORCST}(A.\text{reported\_demand\_gap} + B.\text{reported\_demand\_gap}, \text{shortage\_averaging\_time}, \text{desalination\_development\_delay})$                     |                                   | acre*ft/yr       |
| ○ shortage_averaging_time            | 10                                                                                                                                                                              |                                   | yr               |
| ○ strategic_thinking_weight          | 0.5                                                                                                                                                                             |                                   | 1                |
| □ Water:                             |                                                                                                                                                                                 |                                   |                  |
| ▢ brackish_water(t)                  | $\text{brackish\_water}(t - dt) + (\text{brackish\_water\_intrusion} - \text{desalination\_rate}) * dt$                                                                         | INIT brackish_water = 54e6        | acre*ft          |
| ▢ Desalinated_Water(t)               | $\text{Desalinated\_Water}(t - dt) + (\text{desalination\_rate} - \text{desal\_water\_withdrawal}) * dt$                                                                        | INIT<br>Desalinated_Water = 0     | acre*ft          |
| ▢ Freshwater(t)                      | $\text{Freshwater}(t - dt) + (\text{fresh\_water\_inflow} - \text{freshwater\_withdrawal} - \text{brackish\_water\_intrusion}) * dt$                                            | INIT Freshwater = 6e5             | acre*ft          |
| ▢ withdrawn_water(t)                 | $\text{withdrawn\_water}(t - dt) + (\text{freshwater\_withdrawal} + \text{desal\_water\_withdrawal} - \text{water\_consumption}) * dt$                                          | INIT<br>withdrawn_water = 25000   | acre*ft          |
| ⚙ brackish_water_intrusion           | $\text{Freshwater} * \text{fr\_fresh\_water\_intruded}$                                                                                                                         |                                   | acre*ft/yr       |
| ⚙ desal_water_withdrawal             | $(\text{Demand.withdrawal\_demand} - \text{freshwater\_withdrawal}) * \text{desal\_availability}$                                                                               |                                   | acre*ft/yr       |
| ⚙ desalination_rate                  | $\text{Desalination\_Capacity}.\text{Desalination\_Capacity} * \text{Desalination\_Capacity}.\text{desalination\_capacity\_utilization} * \text{brackish\_water\_availability}$ |                                   | acre*ft/yr       |

|                                                                                    |                                      |                                                                                                                                                                                                                             |                                  |                  |
|------------------------------------------------------------------------------------|--------------------------------------|-----------------------------------------------------------------------------------------------------------------------------------------------------------------------------------------------------------------------------|----------------------------------|------------------|
|     | fresh_water_inflow                   | 781                                                                                                                                                                                                                         |                                  | acre*ft/yr       |
|    | freshwater_withdrawal                | Demand.withdrawal_demand * freshwater_availability                                                                                                                                                                          |                                  | acre*ft/yr       |
|    | water_consumption                    | Demand.consumption_demand *<br>stored_water_availability                                                                                                                                                                    |                                  | acre*ft/yr       |
|    | brackish_avail_p[1]                  | .1                                                                                                                                                                                                                          |                                  | 1                |
|    | brackish_avail_p[2]                  | .5                                                                                                                                                                                                                          |                                  |                  |
|    | brackish_water_availability          | $(\text{LN}(\text{MIN}(1, \text{brackish\_water} / \text{INIT}(\text{brackish\_water})) + 1 - \text{brackish\_avail\_p}[1]) / \text{LN}(2 - \text{brackish\_avail\_p}[1]))^{\text{brackish\_avail\_p}[2]}$                  |                                  | 1                |
|    | consumption_threshold                | 20000                                                                                                                                                                                                                       |                                  | acre*ft/yr       |
|    | desal_avail_p                        | 1                                                                                                                                                                                                                           |                                  | 1                |
|    | desal_availability                   | $(2 - 2 / (\text{MIN}(1, (\text{Desalinated\_Water} / \text{desal\_coverage\_time}) / \text{MAX}(1, \text{Demand.withdrawal\_demand} - \text{freshwater\_withdrawal})) + 1))^{\text{desal\_avail\_p}}$                      |                                  | 1                |
|    | desal_coverage_time                  | 1                                                                                                                                                                                                                           |                                  | yr               |
|    | fr_fresh_water_intruded              | $\text{max\_intrusion\_fr} - \text{max\_intrusion\_fr} / \text{MAX}(1, \text{freshwater\_withdrawal} / \text{consumption\_threshold})^{\text{intrusion\_p}}$                                                                |                                  | 1/yr             |
|    | freshwater_availability              | $(\text{LN}(\text{MIN}(1, \text{Freshwater} / \text{INIT}(\text{Freshwater})) + 1 - \text{fw\_avail\_p}[1]) / \text{LN}(2 - \text{fw\_avail\_p}[1]))^{\text{fw\_avail\_p}[2]}$                                              |                                  | 1                |
|    | fw_avail_p[1]                        | .1                                                                                                                                                                                                                          |                                  | 1                |
|    | fw_avail_p[2]                        | .5                                                                                                                                                                                                                          |                                  |                  |
|    | intrusion_p                          | 1                                                                                                                                                                                                                           |                                  | 1                |
|   | max_intrusion_fr                     | .5                                                                                                                                                                                                                          |                                  | 1/yr             |
|  | stored_water_avail_p[1]              | .1                                                                                                                                                                                                                          |                                  | 1                |
|  | stored_water_avail_p[2]              | .5                                                                                                                                                                                                                          |                                  |                  |
|  | stored_water_availability            | $(\text{LN}(\text{MIN}(1, \text{withdrawn\_water} / \text{INIT}(\text{withdrawn\_water})) + 1 - \text{stored\_water\_avail\_p}[1]) / \text{LN}(2 - \text{stored\_water\_avail\_p}[1]))^{\text{stored\_water\_avail\_p}[2]}$ |                                  | 1                |
| <input type="checkbox"/> A:                                                        |                                      |                                                                                                                                                                                                                             |                                  |                  |
|  | normal_demand_gap(t)                 | $\text{normal\_demand\_gap}(t - dt) + (\text{normal\_demand\_gap\_change}) * dt$                                                                                                                                            | INIT<br>normal_demand_gap<br>= 0 | acre*ft/yr       |
|  | normal_demand_gap_change             | (indicated_normal_demand_gap - normal_demand_gap)                                                                                                                                                                           |                                  | acre*ft/yr/Years |
|  | conservation_effect                  | perceived_water_demand_gap / normal_demand_gap                                                                                                                                                                              |                                  | 1                |
|  | demand_gap                           | water_demand - water_use                                                                                                                                                                                                    |                                  | acre*ft/yr       |
|  | indicated_normal_demand_gap          | perceived_water_demand_gap                                                                                                                                                                                                  |                                  | acre*ft/yr       |
|  | perceived_water_demand_gap           | SMTH1(reported_demand_gap, perception_delay, 0)                                                                                                                                                                             |                                  | acre*ft/yr       |
|  | perception_delay                     | 2                                                                                                                                                                                                                           |                                  | yr               |
|  | reported_demand_gap                  | DELAY(demand_gap, reporting_delay, 0)                                                                                                                                                                                       |                                  | acre*ft/yr       |
|  | reporting_delay                      | 1                                                                                                                                                                                                                           |                                  | yr               |
|  | smooth_conservation_effect_on_demand | conservation_effect                                                                                                                                                                                                         |                                  | 1                |
|  | smooth_conservation_effect_on_use    | conservation_effect                                                                                                                                                                                                         |                                  | acre*ft/yr       |
|  | water_demand                         | smooth_conservation_effect_on_demand                                                                                                                                                                                        |                                  | acre*ft/yr       |
|  | water_use                            | smooth_conservation_effect_on_use                                                                                                                                                                                           |                                  | acre*ft/yr       |
| <input type="checkbox"/> B:                                                        |                                      |                                                                                                                                                                                                                             |                                  |                  |
|  | normal_demand_gap(t)                 | $\text{normal\_demand\_gap}(t - dt) + (\text{normal\_demand\_gap\_change}) * dt$                                                                                                                                            | INIT<br>normal_demand_gap        | acre*ft/yr       |

|                                                                                   |                             |                                                                                                                 |     |                  |
|-----------------------------------------------------------------------------------|-----------------------------|-----------------------------------------------------------------------------------------------------------------|-----|------------------|
|                                                                                   |                             |                                                                                                                 | = 0 |                  |
|   | normal_demand_gap_change    | (indicated_normal_demand_gap - normal_demand_gap) / time_to_adjust_anchor                                       |     | acre*ft/yr/Years |
|   | conservation_effect         | MAX(max_conservation, 1 - conservation_p1 * MAX(0, perceived_water_demand_gap / MAX(1, normal_demand_gap) - 1)) |     | 1                |
|   | conservation_effect_delay   | 3                                                                                                               |     | yr               |
|   | conservation_p1             | .5                                                                                                              |     | 1                |
|   | conservation_p2             | .5                                                                                                              |     | yr               |
|   | consumption                 | consumption_demand * Water.stored_water_availability                                                            |     | acre*ft/yr       |
|   | consumption_demand          | SMTH1(normal_consumption_demand * conservation_effect, conservation_effect_delay)                               |     | acre*ft/yr       |
|   | demand_gap                  | withdrawal_demand - consumption                                                                                 |     | acre*ft/yr       |
|   | indicated_normal_demand_gap | perceived_water_demand_gap * (1 + normal_demand_gap_bias)                                                       |     | acre*ft/yr       |
|   | max_conservation            | 0.5                                                                                                             |     | 1                |
|   | normal_consumption_demand   | 19457.4*.2                                                                                                      |     | acre*ft/yr       |
|   | normal_demand_gap_bias      | 0                                                                                                               |     | 1                |
|   | normal_withdrawal_demand    | 19457.4*.2                                                                                                      |     | acre*ft/yr       |
|   | perceived_water_demand_gap  | SMTH1(reported_demand_gap, perception_delay, 0)                                                                 |     | acre*ft/yr       |
|   | perception_delay            | 2                                                                                                               |     | yr               |
|   | reported_demand_gap         | DELAY(demand_gap, reporting_delay, 0)                                                                           |     | acre*ft/yr       |
|   | reporting_delay             | 1                                                                                                               |     | yr               |
|   | smooth_conservation_effect  | SMTH1(conservation_effect, smooth_delay)                                                                        |     | 1                |
|   | smooth_delay                | 5                                                                                                               |     | yr               |
|   | time_to_adjust_anchor       | 10                                                                                                              |     | yr               |
|  | withdrawal_demand           | normal_withdrawal_demand * smooth_conservation_effect                                                           |     | acre*ft/yr       |

| Run Specs                            |           |
|--------------------------------------|-----------|
| Start Time                           | 1         |
| Stop Time                            | 50        |
| DT                                   | 1/10      |
| Fractional DT                        | True      |
| Save Interval                        | 0.1       |
| Sim Duration                         | 1.4999978 |
| Time Units                           | Years     |
| Pause Interval                       | 0         |
| Integration Method                   | Euler     |
| Keep all variable results            | True      |
| Run By                               | Run       |
| Calculate loop dominance information | True      |
| Exhaustive Search Threshold          | 1000      |

| Array Dimension | Indexed by | Elements |
|-----------------|------------|----------|
|                 |            |          |

|     |        |   |
|-----|--------|---|
| two | Number | 2 |
|-----|--------|---|

|                                                                                             |        |
|---------------------------------------------------------------------------------------------|--------|
| User Macro                                                                                  | Output |
| TRND(<INPUT>, <time to perceive trend>, <time to establish reference condition>, [<ITRND>]) | TRND   |

|                                                                                    |                                         | Equation                                                                                                                                                                                                   | Properties                                                                                                                     | Units       |
|------------------------------------------------------------------------------------|-----------------------------------------|------------------------------------------------------------------------------------------------------------------------------------------------------------------------------------------------------------|--------------------------------------------------------------------------------------------------------------------------------|-------------|
|    | Perceived_Present_Condition_of_Input(t) | $\text{Perceived\_Present\_Condition\_of\_Input}(t - dt) + ("dPPC/dt") * dt$                                                                                                                               | INIT<br>Perceived_Present_Condition_of_Input = INPUT / (1 + time_to_perceive_present_condition * ITRND)                        |             |
|    | Reference_Condition_of_Input(t)         | $\text{Reference\_Condition\_of\_Input}(t - dt) + ("dRC/dt") * dt$                                                                                                                                         | INIT Reference_Condition_of_Input = Perceived_Present_Condition_of_Input / (1 + time_to_establish_reference_condition * ITRND) |             |
|    | TRND(t)                                 | $\text{TRND}(t - dt) + ("dTRND/dt") * dt$                                                                                                                                                                  | INIT TRND = ITRND                                                                                                              | 1/yr        |
|    | "dPPC/dt"                               | $(\text{INPUT} - \text{Perceived\_Present\_Condition\_of\_Input}) / \text{time\_to\_perceive\_present\_condition}$                                                                                         |                                                                                                                                |             |
|    | "dRC/dt"                                | $(\text{Perceived\_Present\_Condition\_of\_Input} - \text{Reference\_Condition\_of\_Input}) / \text{time\_to\_establish\_reference\_condition}$                                                            |                                                                                                                                |             |
|    | "dTRND/dt"                              | $(\text{reference\_trend\_in\_input} - \text{TRND}) / \text{time\_to\_perceive\_trend}$                                                                                                                    |                                                                                                                                | 1/yr/Months |
|    | INPUT                                   | 0                                                                                                                                                                                                          |                                                                                                                                |             |
|  | ITRND                                   | 0                                                                                                                                                                                                          |                                                                                                                                | 1/yr        |
|  | reference_trend_in_input                | $(\text{Perceived\_Present\_Condition\_of\_Input} - \text{Reference\_Condition\_of\_Input}) / \text{MAX}(1e-6, \text{Reference\_Condition\_of\_Input} * \text{time\_to\_establish\_reference\_condition})$ |                                                                                                                                |             |
|  | time_to_establish_reference_condition   | 1                                                                                                                                                                                                          |                                                                                                                                | yr          |
|  | time_to_perceive_present_condition      | $0.2 * \text{time\_to\_establish\_reference\_condition}$                                                                                                                                                   |                                                                                                                                | yr          |
|  | time_to_perceive_trend                  | 1                                                                                                                                                                                                          |                                                                                                                                | yr          |
